# Supplementary material for: Impact of healthcare strikes on patient mortality: a protocol for a systematic review and meta-analysis of observational studies
Source: HighWire-hosted journal article supplement (doi:10.1136/bmjopen-2021-050826), 2021-12-01
Supplement: bmjopen-2021-050826supp002_data_supplement.pdf [file bmjopen-2021-050826supp002_data_supplement.pdf]

## SUPPLEMENTARY FILE 2 – EXPANDED SEARCH STRATEGY

### EMBASE

((strike or "industrial action" or "industrial dispute" or "collective action") and (doctor or physician or clinician or "medical practitioner" or nurs\* or "health profession\*" or healthcare or "health care" or pharmac\* or dentist or midwi\* or dieti\* or "occupational therap\*" or paramed\* or physiotherap\* or radiograph\* or psycholog\* or "health worker" or hospital)).ab

### MEDLINE

((strike or "industrial action" or "industrial dispute" or "collective action") and (doctor or physician or clinician or "medical practitioner" or nurs\* or "health profession\*" or healthcare or "health care" or pharmac\* or dentist or midwi\* or dieti\* or "occupational therap\*" or paramed\* or physiotherap\* or radiograph\* or psycholog\* or "health worker" or hospital)).ab.

### CINAHL

AB ( strike or "industrial action" or "industrial dispute" or "collective action" ) AND AB ( doctor or physician or clinician or "medical practitioner" or nurs\* or "health profession\*" or healthcare or "health care" or pharmac\* or dentist or midwi\* or dieti\* or "occupational therap\*" or paramed\* or physiotherap\* or radiograph\* or psycholog\* or "health worker" or hospital )

### EconLit

AB ( strike or "industrial action" or "industrial dispute" or "collective action" ) AND AB ( doctor or physician or clinician or "medical practitioner" or nurs\* or "health profession\*" or healthcare or "health care" or pharmac\* or dentist or midwi\* or dieti\* or "occupational therap\*" or paramed\* or physiotherap\* or radiograph\* or psycholog\* or "health worker" or hospital )

### WEB OF SCIENCE

TITLE: (strike or "industrial action" or "industrial dispute" or "collective action") AND TITLE: (doctor or physician or clinician or "medical practitioner" or nurs\* or "health profession\*" or healthcare or "health care" or pharmac\* or dentist or midwi\* or dieti\* or "occupational therap\*" or paramed\* or physiotherap\* or radiograph\* or psycholog\* or "health worker" or hospital)

### BIOETHICSLINE

(strike OR "industrial action" OR "industrial dispute" OR "collective action") AND (doctor OR physician OR clinician OR "medical practitioner" OR nurs\* OR "health profession\*" OR healthcare OR "health care" OR pharmac\* OR dentist OR midwi\* OR dieti\* OR "occupational therap\*" OR paramed\* OR physiotherap\* OR radiograph\* OR psycholog\* OR "health worker" OR hospital)

#### SIGMA REPOSITORY

(strike OR "industrial action" OR "industrial dispute" OR "collective action") AND (doctor OR physician OR clinician OR "medical practitioner" OR nurs\* OR "health profession\*" OR healthcare OR "health care" OR pharmac\* OR dentist OR midwi\* OR dieti\* OR "occupational therap\*" OR paramed\* OR physiotherap\* OR radiograph\* OR psycholog\* OR "health worker" OR hospital)

#### OPEN GREY

(strike OR "industrial action" OR "industrial dispute" OR "collective action") AND (doctor OR physician OR clinician OR "medical practitioner" OR nurs\* OR "health profession\*" OR healthcare OR "health care" OR pharmac\* OR dentist OR midwi\* OR dieti\* OR "occupational therap\*" OR paramed\* OR physiotherap\* OR radiograph\* OR psycholog\* OR "health worker" OR hospital)
